# Supplementary material for: Effectiveness of “Moro” Blood Orange Citrus sinensis Osbeck (Rutaceae) Standardized Extract on Weight Loss in Overweight but Otherwise Healthy Men and Women—A Randomized Double-Blind Placebo-Controlled Study
Source: MDPI journal article supplement (doi:10.3390/nu14030427), 2022-01-18
Supplement: s1 [file s1]

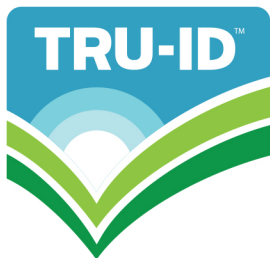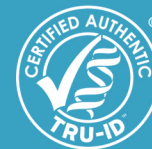

## **Certificate of Authentication**

Certificate of Authentication Number (COA): P001.1-BIO00082020

Client: **Bionap Srl**

Audit date: 09-29-2020

Auditor(s): **Dr. Steven Newmaster (Chief Science Officer, TRU-ID Ltd.)**

Report generated: 11-25-2020

Lot: 08202008-10

### **Molecular Diagnostic Test:**

DNA concentration will be assessed using a Qubit Fluorometer in addition to the TRU-ID DNA authentication test using TRU-ID mini-sequence analysis technology. Molecular diagnostics in this test used Sanger sequencing of standardized DNA sequences for plants. Samples were analyzed against the TRU-ID Plant DNA sequence library.

### **Authenticated:**

The submitted sample name, and its molecular patterns agree with molecular patterns and sample names of TRU-ID reference material and Plant DNA sequence library.

### **TEST RESULTS:**

Certificate of Authentication Numbers (COA): P001.1-BIO00082020

Product Name: Morosil

Latin Binomial: *Citrus sinensis*

Molecular Diagnostic Test Result: Positive

TRU-ID Certification Standard: Verified Compliant

The results and conclusions presented in this report are true and accurate to the best of TRU-ID's knowledge. However, the advanced molecular diagnostics employed can very rarely give rise to inconclusive, or incongruent results, and in such cases corroboration of this result by repeat testing, or different analytical methods may be warranted. This report should not be copied or reproduced, except in its entirety.

| <b>PHYSICAL-CHEMICAL PROPERTIES</b>                                         |                                                                           |
|-----------------------------------------------------------------------------|---------------------------------------------------------------------------|
| PARAMETERS                                                                  | STANDARD VALUES                                                           |
| Form                                                                        | Powder                                                                    |
| Color                                                                       | Red purple                                                                |
| Taste                                                                       | Acid                                                                      |
| Smell                                                                       | Characteristic                                                            |
| Moisture                                                                    | ≤ 5%                                                                      |
| Ashes                                                                       | ≤ 1.2%                                                                    |
| Heavy metals:                                                               | Conform to Reg. EC 1881/2006 and subsequent modifications and supplements |
| Lead (Pb)                                                                   | < 3 ppm                                                                   |
| Arsenic (As)                                                                | < 3 ppm                                                                   |
| Cadmium (Cd)                                                                | < 1 ppm                                                                   |
| Mercury (Hg)                                                                | < 0.1 ppm                                                                 |
| Pesticides                                                                  | Conform to Reg. EC 396/2005 and subsequent modifications and supplements  |
| PAH                                                                         | Conform to Reg. EC 1881/2006 and subsequent modifications and supplements |
| Benzo(a)pyrene                                                              | < 10 µg/kg                                                                |
| Sum of Benzo(a)pyrene, Benz(a)anthracene, Benzo(b)fluoranthene and chrysene | < 50 µg/kg                                                                |
| pH (2,5 % aqueous solution)                                                 | 2.1 – 3.2                                                                 |
| Solubility                                                                  | Moderately soluble in water                                               |
| Residual solvents (ethanol)                                                 | Less than 0.2%                                                            |
| Particle size                                                               | More than 90% pass 300 micron                                             |
| Radioactivity                                                               | The product is not irradiated                                             |

| <b>MICROBIOLOGICAL SPECIFICATIONS</b> |                 |
|---------------------------------------|-----------------|
| PARAMETERS                            | STANDARD VALUES |
| Total plate count                     | < 1000 cfu/g    |
| Yeasts and Moulds                     | < 100 cfu/g     |
| Enterobacteriaceae                    | < 100 cfu/g     |
| Escherichia coli                      | Absent          |
| Pseudomonas aeruginosa                | Absent          |
| Staphylococcus aureus                 | Absent          |
| Salmonella specie                     | Absent          |

| <b>TOXICOLOGICAL EVALUATION</b> |                                                       |
|---------------------------------|-------------------------------------------------------|
| LD <sub>50</sub> (in rats)      | > 2 g/Kg                                              |
| Primary skin irritation         | No irritant<br>Occlusive Patch method (25 volunteers) |
| Cytotoxicity                    | No toxic<br>Epithelial human cells (Caco-2)           |

## ADDITIONAL DATA

**GMO free:** according to Reg. UE 1829/2003 and Reg. UE 1830/2003.
